# Supplementary material for: Salt Cocrystal of Diclofenac Sodium-L-Proline: Structural, Pseudopolymorphism, and Pharmaceutics Performance Study
Source: MDPI journal article supplement (doi:10.3390/pharmaceutics12070690), 2020-07-21

# checkCIF/PLATON report

Structure factors have been supplied for datablock(s) shelx\_a

THIS REPORT IS FOR GUIDANCE ONLY. IF USED AS PART OF A REVIEW PROCEDURE FOR PUBLICATION, IT SHOULD NOT REPLACE THE EXPERTISE OF AN EXPERIENCED CRYSTALLOGRAPHIC REFEREE.

No syntax errors found.      CIF dictionary      Interpreting this report

## Datablock: shelx\_a

---

Bond precision:    C-C = 0.0089 Å                      Wavelength=0.71075

Cell:                      a=7.6073(3)              b=15.2652(7)              c=20.5263(9)  
                            alpha=90              beta=97.602(1)              gamma=90  
Temperature:              296 K

|                | Calculated                                       | Reported                       |
|----------------|--------------------------------------------------|--------------------------------|
| Volume         | 2362.71(18)                                      | 2362.71(18)                    |
| Space group    | P 21                                             | P 21                           |
| Hall group     | P 2yb                                            | P 2yb                          |
| Moiety formula | C10 H30 N2 Na2 O10, 2(C14 H10 Cl2 N O2), 2(H2 O) | C38 H38 Cl4 N4 Na2 O8 , 8(H2O) |
| Sum formula    | C38 H54 Cl4 N4 Na2 O16                           | C38 H54 Cl4 N4 Na2 O16         |
| Mr             | 1010.63                                          | 1010.63                        |
| Dx,g cm-3      | 1.421                                            | 1.421                          |
| Z              | 2                                                | 2                              |
| Mu (mm-1)      | 0.340                                            | 0.340                          |
| F000           | 1056.0                                           | 1056.0                         |
| F000'          | 1057.82                                          |                                |
| h,k,lmax       | 9,19,26                                          | 9,19,26                        |
| Nref           | 10769[ 5588]                                     | 10695                          |
| Tmin,Tmax      | 0.916,0.960                                      | 0.762,0.960                    |
| Tmin'          | 0.915                                            |                                |

Correction method= # Reported T Limits: Tmin=0.762 Tmax=0.960  
AbsCorr = MULTI-SCAN

Data completeness= 1.91/0.99                      Theta(max)= 27.438

R(reflections)= 0.0593( 7586)                      wR2(reflections)= 0.1686( 10695)

S = 1.109                                      Npar= 733

---

The following ALERTS were generated. Each ALERT has the format

**test-name\_ALERT\_alert-type\_alert-level.**

Click on the hyperlinks for more details of the test.

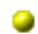

### Alert level C

|                   |                                                  |         |        |
|-------------------|--------------------------------------------------|---------|--------|
| PLAT094_ALERT_2_C | Ratio of Maximum / Minimum Residual Density .... | 2.20    | Report |
| PLAT242_ALERT_2_C | Low 'MainMol' Ueq as Compared to Neighbors of    | Na1     | Check  |
| PLAT242_ALERT_2_C | Low 'MainMol' Ueq as Compared to Neighbors of    | Na2     | Check  |
| PLAT242_ALERT_2_C | Low 'MainMol' Ueq as Compared to Neighbors of    | C14     | Check  |
| PLAT242_ALERT_2_C | Low 'MainMol' Ueq as Compared to Neighbors of    | C28     | Check  |
| PLAT340_ALERT_3_C | Low Bond Precision on C-C Bonds .....            | 0.00886 | Ang.   |
| PLAT910_ALERT_3_C | Missing # of FCF Reflection(s) Below Theta(Min). | 8       | Note   |
| PLAT975_ALERT_2_C | Check Calcd Resid. Dens. 0.63A From O13          | 0.67    | eA-3   |
| PLAT975_ALERT_2_C | Check Calcd Resid. Dens. 0.54A From O13          | 0.56    | eA-3   |
| PLAT975_ALERT_2_C | Check Calcd Resid. Dens. 0.98A From O10          | 0.50    | eA-3   |
| PLAT975_ALERT_2_C | Check Calcd Resid. Dens. 0.87A From N1           | 0.45    | eA-3   |

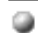

### Alert level G

|                   |                                                  |       |              |
|-------------------|--------------------------------------------------|-------|--------------|
| PLAT002_ALERT_2_G | Number of Distance or Angle Restraints on AtSite | 51    | Note         |
| PLAT003_ALERT_2_G | Number of Uiso or Uij Restrained non-H Atoms ... | 17    | Report       |
| PLAT004_ALERT_5_G | Polymeric Structure Found with Maximum Dimension | 1     | Info         |
| PLAT007_ALERT_5_G | Number of Unrefined Donor-H Atoms .....          | 10    | Report       |
| PLAT042_ALERT_1_G | Calc. and Reported MoietyFormula Strings Differ  |       | Please Check |
| PLAT111_ALERT_2_G | ADDSYM Detects New (Pseudo) Centre of Symmetry . | 94    | %Fit         |
| PLAT112_ALERT_2_G | ADDSYM Detects New (Pseudo) Symm. Elem a         | 94    | %Fit         |
| PLAT113_ALERT_2_G | ADDSYM Suggests Possible Pseudo/New Space Group  | P21/c | Check        |
| PLAT172_ALERT_4_G | The CIF-Embedded .res File Contains DFIX Records | 17    | Report       |
| PLAT178_ALERT_4_G | The CIF-Embedded .res File Contains SIMU Records | 1     | Report       |
| PLAT186_ALERT_4_G | The CIF-Embedded .res File Contains ISOR Records | 3     | Report       |
| PLAT301_ALERT_3_G | Main Residue Disorder .....(Resd 1 )             | 46%   | Note         |
| PLAT720_ALERT_4_G | Number of Unusual/Non-Standard Labels .....      | 26    | Note         |
| PLAT860_ALERT_3_G | Number of Least-Squares Restraints .....         | 154   | Note         |
| PLAT883_ALERT_1_G | No Info/Value for _atom_sites_solution_primary . |       | Please Do !  |
| PLAT912_ALERT_4_G | Missing # of FCF Reflections Above STh/L= 0.600  | 27    | Note         |
| PLAT978_ALERT_2_G | Number C-C Bonds with Positive Residual Density. | 2     | Info         |

- 
- 0 **ALERT level A** = Most likely a serious problem - resolve or explain  
0 **ALERT level B** = A potentially serious problem, consider carefully  
11 **ALERT level C** = Check. Ensure it is not caused by an omission or oversight  
17 **ALERT level G** = General information/check it is not something unexpected
- 2 ALERT type 1 CIF construction/syntax error, inconsistent or missing data  
15 ALERT type 2 Indicator that the structure model may be wrong or deficient  
4 ALERT type 3 Indicator that the structure quality may be low  
5 ALERT type 4 Improvement, methodology, query or suggestion  
2 ALERT type 5 Informative message, check
-

It is advisable to attempt to resolve as many as possible of the alerts in all categories. Often the minor alerts point to easily fixed oversights, errors and omissions in your CIF or refinement strategy, so attention to these fine details can be worthwhile. In order to resolve some of the more serious problems it may be necessary to carry out additional measurements or structure refinements. However, the purpose of your study may justify the reported deviations and the more serious of these should normally be commented upon in the discussion or experimental section of a paper or in the "special\_details" fields of the CIF. checkCIF was carefully designed to identify outliers and unusual parameters, but every test has its limitations and alerts that are not important in a particular case may appear. Conversely, the absence of alerts does not guarantee there are no aspects of the results needing attention. It is up to the individual to critically assess their own results and, if necessary, seek expert advice.

### **Publication of your CIF in IUCr journals**

A basic structural check has been run on your CIF. These basic checks will be run on all CIFs submitted for publication in IUCr journals (*Acta Crystallographica*, *Journal of Applied Crystallography*, *Journal of Synchrotron Radiation*); however, if you intend to submit to *Acta Crystallographica Section C* or *E* or *IUCrData*, you should make sure that full publication checks are run on the final version of your CIF prior to submission.

### **Publication of your CIF in other journals**

Please refer to the *Notes for Authors* of the relevant journal for any special instructions relating to CIF submission.

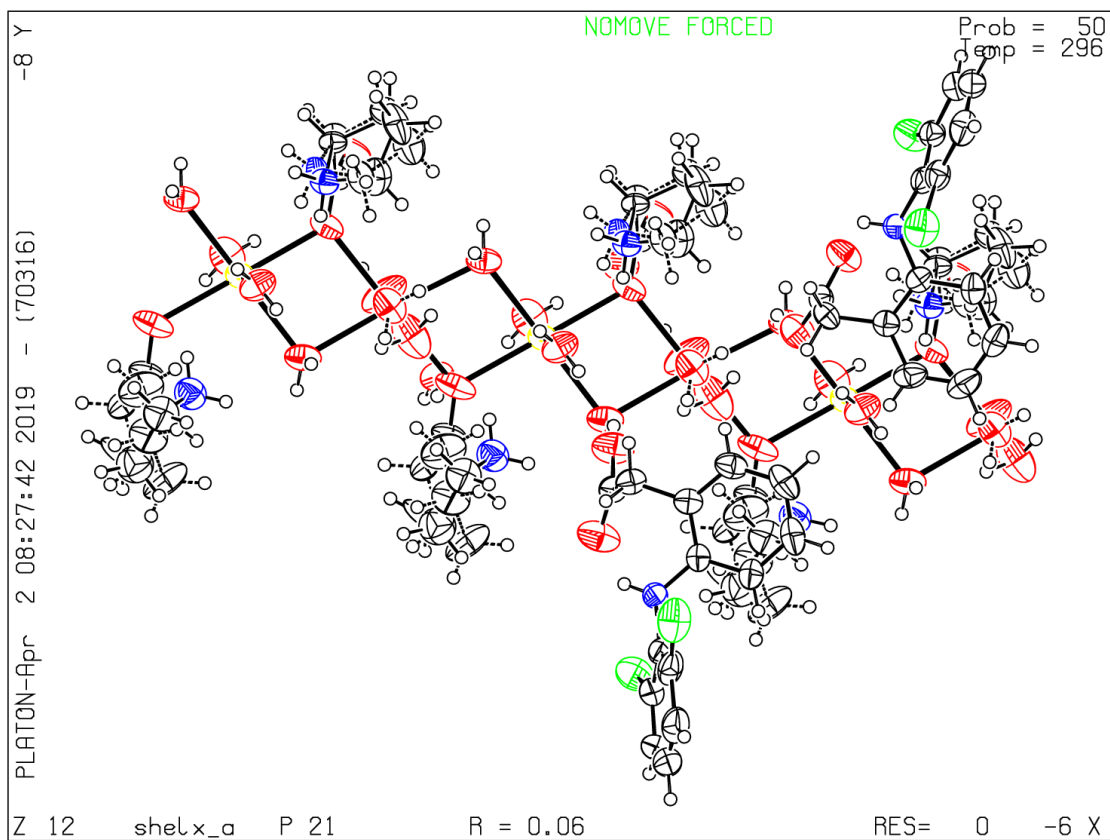

Supplement: s1 [file s1]
