# Supplementary material for: Salt Cocrystal of Diclofenac Sodium-L-Proline: Structural, Pseudopolymorphism, and Pharmaceutics Performance Study
Source: MDPI journal article supplement (doi:10.3390/pharmaceutics12070690), 2020-07-21
Supplement: s1 [file s1]

# Supplementary Materials: Structural, Pseudopolymorphism, and Pharmaceutics Performance Study

Ilma Nugrahani \*, Rizka A. Kumalasari, Winni N. Auli, Ayano Horikawa and Hidehiro Uekusa

Supplementary 3

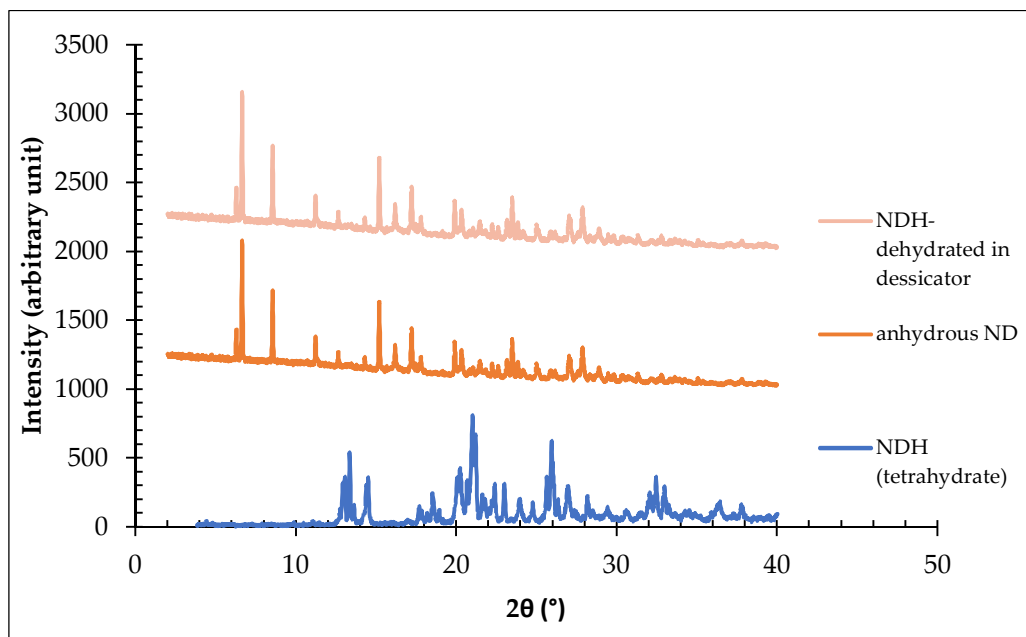

S3(1): Diffractogram of ND and NDH

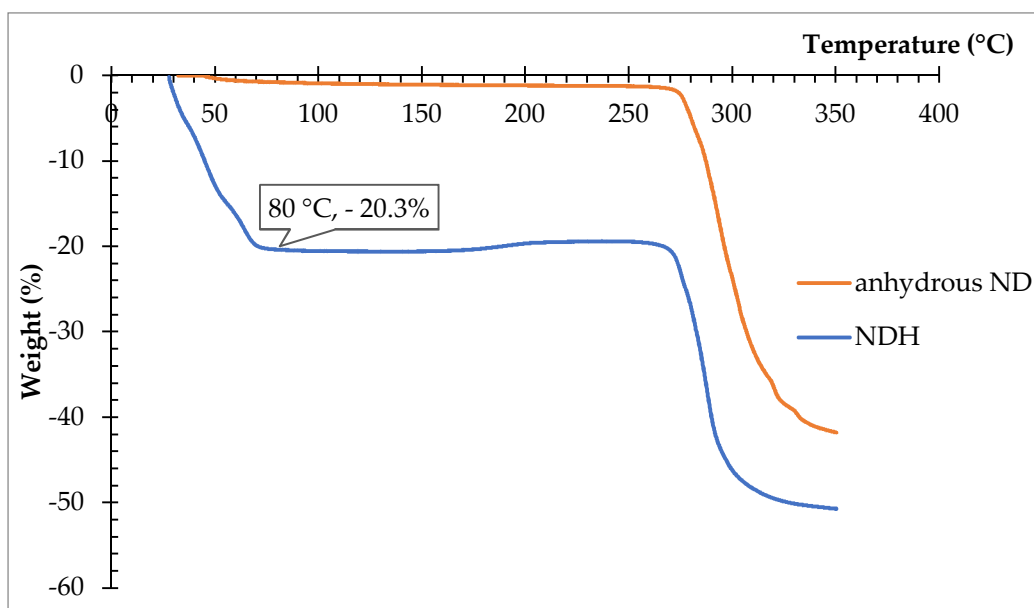

S3(2): TG-thermogram of ND and NDH
